# Supplementary material
Source: publisher site journal article supplement (https://www.degruyter.com/publication/journal_key/IJFE/downloadAsset/IJFE_Manuscript%20Checklist.pdf)
Supplement: Supplementary file 1 [file IJFE_Manuscript%20Checklist.pdf]

## General format and length of article types accepted for submission

**Word count: title page, abstract, tables, figures, references, abbreviations, appendices & supplementary material are excluded.**

[illegible]

**When you submit your work, please ensure the following**

- You have read the [Instructions for Authors](#).
- The manuscript is complete and uploaded correctly. The HTML version and/or the PDF file generated from the submitted files must be complete and approved.
- The language in which the manuscript was written is correct and has been checked by a native speaker or a professional language service, if applicable.
- The title page information includes the full title, short title, the full names of all authors (given name, middle initials, family name), and the full address, affiliation and the academic title of the corresponding author. The title page should also indicate the word count, the number of tables and figures, and whether the submission includes any supplementary material.
- All figures and tables have been uploaded and appear correctly at the end of the generated PDF.
- Abstract, keywords, list of abbreviations, tables and figures, and captions and legends are included, depending on the manuscript type.
- Manuscript is spell-checked and within the word limit for the type of article.
- References are in the correct format according to the Instructions for Authors.
- References mentioned in the reference list are cited in the text and vice versa.
